# Supplementary material
Source: publisher figshare collection journal article supplement (https://acs.figshare.com/ndownloader/files/5911230)

## Supporting Information for

### ***Unified Total Synthesis of Five Gelsedine-type Alkaloids: (–)-Gelsenicine, (–)-Gelsedine, (–)-Gelsedilam, (–)-14-Hydroxygelsenicine, and (–)-14,15-Dihydroxygelsenicine***

Takaaki Harada, Jun Shimokawa, and Tohru Fukuyama\*

*Graduate School of Pharmaceutical Sciences, University of Tokyo, 7-3-1 Hongo, Bunkyo-ku, Tokyo 113-0033, Japan*

*Graduate School of Pharmaceutical Sciences, Nagoya University, Furo-cho, Chikusa, Nagoya, Aichi 464-8601, Japan.*

fukuyama@ps.nagoya-u.ac.jp

|                          |     |
|--------------------------|-----|
| ·General Remarks         | S1  |
| ·Experimental Procedures | S2  |
| ·Spectral Data           | S14 |

**General.** All non-aqueous reactions were carried out under an inert atmosphere of argon in oven-dried glassware unless otherwise noted. Dehydrated tetrahydrofuran, dichloromethane and toluene were purchased from Kanto Chemicals Co., and were used after passing commercially available pre-dried, oxygen-free formulations through activated alumina columns. Dehydrated methanol, ethanol, pyridine and acetonitrile were purchased from Wako Pure Chemical Industries, Ltd. and stored over activated MS3A\*. All other reagents were commercially available and used without further purification. Analytical thin layer chromatography (TLC) was performed on Merck precoated analytical plates, 0.25 mm thick, silica gel 60F<sub>254</sub>. Preparative flash chromatography was performed using Silica Gel 60 (spherical, 40-100 µm) purchased from Kanto Chemical Co., Inc. Preparative thin layer chromatography (PTLC) separations were performed on Merck analytical plates (0.25 or 0.50 mm thick) precoated with silica gel 60 F<sub>254</sub>. <sup>1</sup>H and <sup>13</sup>C NMR were recorded on a JEOL ECS-400 spectrometer. All <sup>1</sup>H NMR spectra are reported in units, parts per million (ppm) downfield from tetramethylsilane as the internal standard and coupling constants are indicated in Hertz (Hz). The following abbreviations are used for spin multiplicity: s = singlet, d = doublet, t = triplet, q = quartet, m = multiplet, br = broad. All <sup>13</sup>C NMR spectra are reported in ppm relative to the central line of the triplet for CDCl<sub>3</sub> at 77.0 ppm. Infrared spectra (IR) were recorded on a JASCO FT/IR-4100 Fourier Transform Infrared Spectrophotometer, and are reported in wavenumbers (cm<sup>-1</sup>). High resolution mass spectra (HRMS) were obtained on a JEOL JMS-T100LP AccuTOF LC-plus in positive electrospray ionization (ESI) method using PEG or sodium trifluoroacetate as the internal standard. Optical rotations were measured on a JASCO P-2200 Digital Polarimeter at room temperature, using the sodium D line. Melting points, determined on a Yanaco Micro Melting Point Apparatus, are uncorrected.

---

\* Molecular sieves were “activated” in the following manner: A round-bottom flask containing molecular sieves was heated in a regular microwave for 1.5-2.0 minute and the flask was immediately evacuated. When cooled to room temperature, the flask was backfilled with argon. The above procedure was repeated three times.

**Methyl (1*R*,2*S*,4*S*,5*S*,9*R*)-4-(((benzyloxy)carbonyl)amino)-1'-methoxy-2'-oxo-7-oxaspiro[bicyclo[3.2.2]nonane-2,3'-indoline]-9-carboxylate (12)**

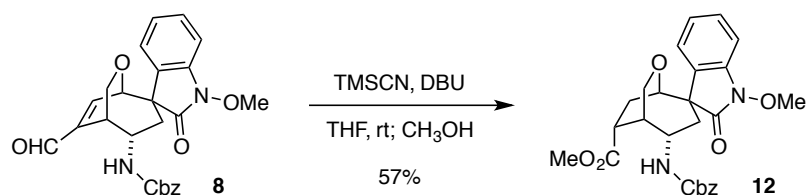

A 10-mL, screw cap glass test tube equipped with a magnetic stir bar was charged with **8** (5.1 mg, 0.011 mmol) and THF (300  $\mu$ L). The solution was added TMSCN (14.2  $\mu$ L, 0.114 mmol) and DBU (13.6  $\mu$ L, 0.0909 mmol) at room temperature and stirred at the same temperature for 30 min. The reaction mixture was added CH<sub>3</sub>OH (46  $\mu$ L, 1.14 mmol) and the stirring was continued for additional 30 min. The reaction was quenched with sat. NaHCO<sub>3</sub> aq (1 mL) and the resulting mixture was partitioned between EtOAc (1 mL) and water (1 mL). The organic phase was collected and the aqueous phase was extracted with EtOAc (1 mL) three times. The combined organic phase was dried over MgSO<sub>4</sub> (ca. 1 g), filtered and concentrated *in vacuo* to give the mixture of the diastereomers (**12**:15-*epi*-**12** = 2.6:1). The residue was purified by preparative thin layer chromatography (*n*-hexane/EtOAc = 1/1) to afford **10** (3.1 mg, 6.5  $\mu$ mol, 57%) as white foam. [TH03065, TH05208]

$R_f$  = 0.35 (*n*-hexane/EtOAc = 1/1, UV, Ce-PMA);

$[\alpha]_D^{23}$  -94.7 ( $c$  = 0.72, CHCl<sub>3</sub>);

IR (film, cm<sup>-1</sup>) 2944, 1717, 1507, 1232;

<sup>1</sup>H NMR (CDCl<sub>3</sub>, 400 MHz)  $\delta$  7.50 (d,  $J$  = 7.6 Hz, 1H), 7.40–7.27 (m, 6H), 7.12 (dd,  $J$  = 7.6, 7.6 Hz, 1H), 7.00 (d,  $J$  = 7.6 Hz, 1H), 6.22 (d,  $J$  = 8.7 Hz, 1H), 5.09 (d,  $J$  = 12.4 Hz, 1H), 5.02 (d,  $J$  = 12.4 Hz, 1H), 4.48 (ddd,  $J$  = 12.8, 8.7, 4.6 Hz, 1H), 4.13 (dd,  $J$  = 10.1, 2.1 Hz, 1H), 3.98 (s, 3H), 3.91 (dd,  $J$  = 10.1, 2.4 Hz, 1H), 3.78 (s, 3H), 3.67 (d,  $J$  = 6.4 Hz, 1H), 3.17 (dd,  $J$  = 15.6, 5.0 Hz, 1H), 2.98 (ddd,  $J$  = 12.8, 5.0, 5.0 Hz, 1H), 2.70 (br, 1H), 2.37 (ddd,  $J$  = 15.6, 12.8, 6.4 Hz, 1H), 2.13 (dd,  $J$  = 13.7, 12.8 Hz, 1H), 1.73 (dd,  $J$  = 13.7, 4.6 Hz, 1H);

<sup>13</sup>C NMR (CDCl<sub>3</sub>, 100 MHz)  $\delta$  175.6 (C), 172.0 (C), 155.4 (C), 138.7 (C), 136.6 (C), 128.5 (CH), 128.4 (CH), 128.03 (C), 128.03 (CH), 127.9 (CH), 126.9 (CH), 123.3 (CH), 107.2 (CH), 71.2 (CH), 69.3 (CH<sub>2</sub>), 66.5 (CH<sub>2</sub>), 63.4 (CH<sub>3</sub>), 53.3 (C), 53.0 (CH), 52.5 (CH<sub>3</sub>), 40.2 (CH), 37.3 (CH), 34.5 (CH<sub>2</sub>), 23.3 (CH<sub>2</sub>);

HRMS (ESI) calcd for C<sub>26</sub>H<sub>28</sub>N<sub>2</sub>NaO<sub>7</sub> ([M+Na]<sup>+</sup>) 503.1794, found 503.1776.

### Gelsedilam (3)

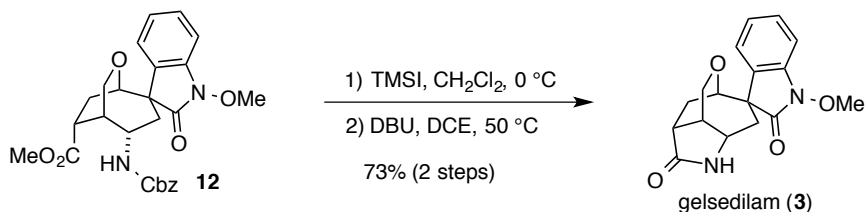

A 10-mL, screw cap glass test tube equipped with a magnetic stir bar was charged with **12** (2.1 mg, 4.4  $\mu$ mol) and CH<sub>2</sub>Cl<sub>2</sub> (300  $\mu$ L). The clear solution was stirred at 0 °C for 5 min, then freshly prepared trimethylsilyl iodide<sup>1</sup> (1.0 M solution in CH<sub>2</sub>Cl<sub>2</sub>, 43.7  $\mu$ L, 0.0437 mmol) was added and warmed to room temperature. After 20 min at room temperature, the reaction mixture was added NH<sub>3</sub> in CH<sub>3</sub>OH (7.0 M solution, 6.2  $\mu$ L, 0.044 mmol) and the solution was concentrated *in vacuo*. The residue was dissolved in 1,2-dichloroethane (300  $\mu$ L), then DBU (9.8  $\mu$ L, 0.066 mmol) was added at room temperature. The solution was warmed to 50 °C and stirring was continued for 90 min. The reaction was quenched with sat. NH<sub>4</sub>Cl aq (1 mL) and extracted with CHCl<sub>3</sub>/CH<sub>3</sub>OH = 9/1 (1 mL). The organic phase was collected and the aqueous phase was extracted with CHCl<sub>3</sub>/CH<sub>3</sub>OH = 9/1 (1 mL) three times. The combined organic phase was dried over MgSO<sub>4</sub> (ca. 1 g), filtered and concentrated *in vacuo*. The residue was purified by preparative thin layer chromatography (CHCl<sub>3</sub>/CH<sub>3</sub>OH = 9/1) to afford gelsedilam (**3**) (1.0 mg, 3.2  $\mu$ mol, 73%) as white foam. [TH03050, TH05241, TH05242]

R<sub>f</sub> = 0.40 (CHCl<sub>3</sub>/CH<sub>3</sub>OH = 9/1, UV, Ce-PMA);

[ $\alpha$ ]<sub>D</sub><sup>22</sup> -148 (*c* = 0.40, CHCl<sub>3</sub>);

IR (film, cm<sup>-1</sup>) 3319, 2925, 1716, 1681, 1616, 1465, 1043;

<sup>1</sup>H NMR (CDCl<sub>3</sub>, 400 MHz)  $\delta$  7.48 (d, *J* = 7.8 Hz, 1H), 7.28 (ddd, *J* = 7.8, 7.8, 1.4 Hz, 1H), 7.09 (ddd, *J* = 7.8, 7.8, 1.4 Hz, 1H), 6.92 (d, *J* = 7.8 Hz, 1H), 5.68 (brs, 1H), 4.24 (brd, *J* = 2.3 Hz, 2H), 4.12 (m, 1H), 3.96 (s, 3H), 3.80 (dd, *J* = 5.0, 1.4 Hz, 1H), 2.86 (brt, *J* = 8.2 Hz, 1H), 2.65 (dd, *J* = 10.5, 8.2 Hz, 1H), 2.52 (brd, *J* = 15.3 Hz, 1H), 2.34 (dd, *J* = 15.6, 4.1 Hz, 1H), 2.33 (ddd, *J* = 15.3, 10.5, 5.0 Hz, 1H), 2.02 (dd, *J* = 15.6, 2.3 Hz, 1H);

<sup>13</sup>C NMR (CDCl<sub>3</sub>, 100 MHz)  $\delta$  180.0, 171.6, 138.4, 131.4, 128.2, 124.3, 123.3, 106.9, 74.8, 63.4, 62.0, 56.6, 55.8, 36.6, 36.4, 35.7, 27.0;

HRMS (ESI) calcd for C<sub>17</sub>H<sub>18</sub>N<sub>2</sub>NaO<sub>4</sub> ([M+Na]<sup>+</sup>) 337.1164, found 337.1163.

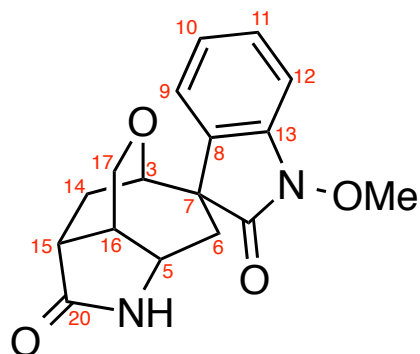

<sup>1</sup>H and <sup>13</sup>C NMR Data for Gelsedilam (**3**)

|                            | Reference (Natural)                                                    |                                           | This Synthesis                                                            |                              |
|----------------------------|------------------------------------------------------------------------|-------------------------------------------|---------------------------------------------------------------------------|------------------------------|
|                            | $\delta_{\text{H}}$ (400 Hz) <sup>2</sup>                              | $\delta_{\text{C}}$ (125 Hz) <sup>2</sup> | $\delta_{\text{H}}$ (400 Hz)                                              | $\delta_{\text{C}}$ (100 Hz) |
| 2                          |                                                                        | 171.6                                     |                                                                           | 171.6                        |
| 3                          | 3.80 (dd, $J$ = 4.8, 2.0 Hz, 1H)                                       | 74.8                                      | 3.80 (dd, $J$ = 5.0, 1.4 Hz, 1H)                                          | 74.8                         |
| 5                          | 4.12 (m, 1H)                                                           | 56.5                                      | 4.12 (m, 1H)                                                              | 56.6                         |
| 6                          | 2.35 (dd, $J$ = 15.6, 3.9 Hz, 1H)<br>2.03 (dd, $J$ = 15.6, 2.4 Hz, 1H) | 36.6                                      | 2.34 (dd, $J$ = 15.6, 4.1 Hz, 1H)<br>2.02 (dd, $J$ = 15.6, 2.3 Hz, 1H)    | 36.4                         |
| 7                          |                                                                        | 55.8                                      |                                                                           | 55.8                         |
| 8                          |                                                                        | 131.3                                     |                                                                           | 131.4                        |
| 9                          | 7.48 (d, $J$ = 7.6 Hz, 1H)                                             | 124.4                                     | 7.48 (d, $J$ = 7.8 Hz, 1H)                                                | 124.3                        |
| 10                         | 7.08 (t, $J$ = 7.6 Hz, 1H)                                             | 123.4                                     | 7.09 (ddd, $J$ = 7.8, 7.8, 1.4 Hz, 1H)                                    | 123.3                        |
| 11                         | 7.28 (t, $J$ = 7.6 Hz, 1H)                                             | 128.4                                     | 7.28 (ddd, $J$ = 7.8, 7.8, 1.4 Hz, 1H)                                    | 128.2                        |
| 12                         | 6.91 (d, $J$ = 7.6 Hz, 1H)                                             | 107.0                                     | 6.92 (d, $J$ = 7.8 Hz, 1H)                                                | 106.9                        |
| 13                         |                                                                        | 138.4                                     |                                                                           | 138.4                        |
| 14                         | 2.53 (brd, $J$ = 15.4 Hz, 1H)<br>2.31 (m, 1H)                          | 27.1                                      | 2.52 (brd, $J$ = 15.3 Hz, 1H)<br>2.33 (ddd, $J$ = 15.3, 10.5, 5.0 Hz, 1H) | 27.0                         |
| 15                         | 2.65 (dd, $J$ = 9.0, 8.2 Hz, 1H)                                       | 36.7                                      | 2.65 (dd, $J$ = 10.5, 8.2 Hz, 1H)                                         | 36.6                         |
| 16                         | 2.86 (brt, $J$ = 8.2 Hz, 1H)                                           | 35.6                                      | 2.86 (brt, $J$ = 8.2 Hz, 1H)                                              | 35.7                         |
| 17                         | 4.24 (m, 2H)                                                           | 62.0                                      | 4.24 (brd, $J$ = 2.3 Hz, 2H)                                              | 62.0                         |
| 20                         |                                                                        | 179.8                                     |                                                                           | 180.0                        |
| <i>N</i> <sub>a</sub> -OMe | 3.95 (s, 3H)                                                           | 63.6                                      | 3.96 (s, 3H)                                                              | 63.4                         |
| <i>N</i> <sub>b</sub> -H   | 5.77 (brs, 1H)                                                         |                                           | 5.68 (brs, 1H)                                                            |                              |

## Gelsenicine (1)

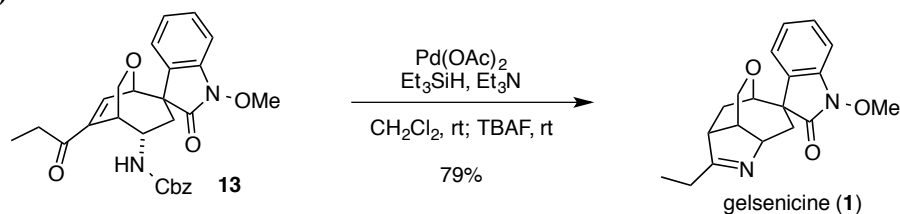

A 10-mL, screw cap glass test tube equipped with a magnetic stir bar was charged with **13** (4.6 mg, 9.7  $\mu\text{mol}$ ),  $\text{Pd}(\text{OAc})_2$  (2.2 mg, 9.7  $\mu\text{mol}$ ),  $\text{Et}_3\text{N}$  (4.0  $\mu\text{L}$ , 0.029 mmol), and  $\text{CH}_2\text{Cl}_2$  (300  $\mu\text{L}$ ). The clear solution was stirred at room temperature for 5 min, then  $\text{Et}_3\text{SiH}$  (15.4  $\mu\text{L}$ , 0.0965 mmol) was added. After stirring for 30 min at the same temperature, the reaction mixture was added TBAF (1.0 M solution in THF, 9.7  $\mu\text{L}$ , 9.7  $\mu\text{mol}$ ) and stirring was continued for additional 30 min at room temperature. The reaction was quenched with sat.  $\text{NaHCO}_3$  aq (1 mL) and extracted with  $\text{CHCl}_3/\text{CH}_3\text{OH} = 9/1$  (1 mL). The organic phase was collected and the aqueous phase was extracted with  $\text{CHCl}_3/\text{CH}_3\text{OH} = 9/1$  (1 mL) three times. The combined organic phase was dried over  $\text{MgSO}_4$  (ca. 1 g), filtered and concentrated *in vacuo*. The residue was purified by flash column chromatography on silica gel ( $\text{CH}_2\text{Cl}_2/\text{CH}_3\text{OH} = 100/1$  to 25/1) to afford gelsenicine (**1**) (2.5 mg, 7.7  $\mu\text{mol}$ , 79%) as white solid. [TH03066, TH05226]

$R_f = 0.37$  ( $\text{CHCl}_3/\text{CH}_3\text{OH} = 9/1$ , UV, Ce-PMA);

Mp 167.5–169.5  $^\circ\text{C}$ ;

$[\alpha]_D^{23} -147$  ( $c = 0.45$ ,  $\text{CHCl}_3$ );

IR (film,  $\text{cm}^{-1}$ ) 2965, 1726, 1465;

$^1\text{H}$  NMR ( $\text{CDCl}_3$ , 400 MHz)  $\delta$  7.54 (d,  $J = 7.3$  Hz, 1H), 7.26 (ddd,  $J = 7.8, 7.8, 1.4$  Hz, 1H), 7.07 (ddd,  $J = 7.8, 7.3, 0.9$  Hz, 1H), 6.88 (d,  $J = 7.8$  Hz, 1H), 4.41 (m, 1H), 4.30 (dd,  $J = 11.0, 2.8$  Hz, 1H), 4.27 (dd,  $J = 11.0, 1.8$  Hz, 1H), 3.95 (s, 3H), 3.73 (dd,  $J = 4.4, 1.8$  Hz, 1H), 2.86 (dd,  $J = 9.2, 9.2$  Hz, 1H), 2.72 (dq,  $J = 17.4, 7.3$  Hz, 1H), 2.57 (m, 1H), 2.40 (dq,  $J = 17.4, 7.3$  Hz, 1H), 2.40 (dd,  $J = 15.6, 4.6$  Hz, 1H), 2.37 (dd,  $J = 15.2, 1.8$  Hz, 1H), 2.29 (dd,  $J = 15.6, 2.3$  Hz, 1H), 2.14 (ddd,  $J = 15.2, 9.6, 4.4$  Hz, 1H), 1.29 (t,  $J = 7.3$  Hz, 3H);

$^{13}\text{C}$  NMR ( $\text{CDCl}_3$ , 100 MHz)  $\delta$  184.3, 171.2, 138.0, 132.2, 128.0, 124.6, 123.3, 106.5, 74.9, 72.5, 63.3, 62.1, 55.8, 42.5, 39.8, 37.7, 27.0, 25.6, 10.0;

HRMS (ESI) calcd for  $\text{C}_{19}\text{H}_{22}\text{N}_2\text{NaO}_3$  ( $[\text{M}+\text{Na}]^+$ ) 349.1528, found 349.1534.

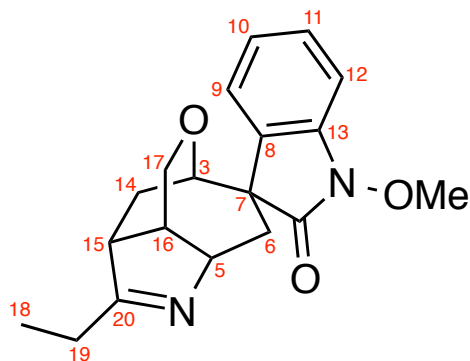

<sup>1</sup>H and <sup>13</sup>C NMR Data for Gelsenicine (**1**)

|                            | Reference (Semisynthesis)                 |                                           | This Synthesis                          |                              |
|----------------------------|-------------------------------------------|-------------------------------------------|-----------------------------------------|------------------------------|
|                            | $\delta_{\text{H}}$ (500 Hz) <sup>3</sup> | $\delta_{\text{C}}$ (125 Hz) <sup>4</sup> | $\delta_{\text{H}}$ (400 Hz)            | $\delta_{\text{C}}$ (100 Hz) |
| 2                          |                                           | 171.2                                     |                                         | 171.2                        |
| 3                          | 3.74 (dd, $J = 4.7, 2.0$ Hz, 1H)          | 74.8                                      | 3.73 (dd, $J = 4.4, 1.8$ Hz, 1H)        | 74.9                         |
| 5                          | 4.40 (m, 1H)                              | 72.5                                      | 4.41 (m, 1H)                            | 72.5                         |
| 6                          | 2.40 (dd, $J = 15.6, 5.0$ Hz, 1H)         | 37.7                                      | 2.40 (dd, $J = 15.6, 4.6$ Hz, 1H)       | 37.7                         |
|                            | 2.29 (dd, $J = 15.6, 2.2$ Hz, 1H)         |                                           | 2.29 (dd, $J = 15.6, 2.3$ Hz, 1H)       |                              |
| 7                          |                                           | 55.8                                      |                                         | 55.8                         |
| 8                          |                                           | 132.2                                     |                                         | 132.2                        |
| 9                          | 7.53 (d, $J = 7.0$ Hz, 1H)                | 124.6                                     | 7.54 (d, $J = 7.3$ Hz, 1H)              | 124.6                        |
| 10                         | 7.07 (td, $J = 7.6, 1.0$ Hz, 1H)          | 123.3                                     | 7.07 (ddd, $J = 7.8, 7.3, 0.9$ Hz, 1H)  | 123.3                        |
| 11                         | 7.25 (td, $J = 7.5, 1.3$ Hz, 1H)          | 128.0                                     | 7.26 (ddd, $J = 7.8, 7.8, 1.4$ Hz, 1H)  | 128.0                        |
| 12                         | 6.87 (d, $J = 7.9$ Hz, 1H)                | 106.5                                     | 6.88 (d, $J = 7.8$ Hz, 1H)              | 106.5                        |
| 13                         |                                           | 138.0                                     |                                         | 138.0                        |
| 14                         | 2.39 (dd, $J = 14.9, 2.2$ Hz, 1H)         | 27.0                                      | 2.37 (dd, $J = 15.2, 1.8$ Hz, 1H)       | 27.0                         |
|                            | 2.13 (ddd, $J = 14.9, 10.3, 4.6$ Hz, 1H)  |                                           | 2.14 (ddd, $J = 15.2, 9.6, 4.4$ Hz, 1H) |                              |
| 15                         | 2.86 (t, $J = 9.3$ Hz, 1H)                | 42.5                                      | 2.86 (dd, $J = 9.2, 9.2$ Hz, 1H)        | 42.5                         |
| 16                         | 2.57 (m, 1H)                              | 39.8                                      | 2.57 (m, 1H)                            | 39.8                         |
| 17                         | 4.30 (dd, $J = 11.0, 3.9$ Hz, 1H)         | 62.1                                      | 4.30 (dd, $J = 11.0, 2.8$ Hz, 1H)       | 62.1                         |
|                            | 4.27 (dd, $J = 11.0, 1.7$ Hz, 1H)         |                                           | 4.27 (dd, $J = 11.0, 1.8$ Hz, 1H)       |                              |
| 18                         | 1.29 (t, $J = 7.3$ Hz, 3H)                | 10.0                                      | 1.29 (t, $J = 7.3$ Hz, 3H)              | 10.0                         |
| 19                         | 2.71 (dq, $J = 17.1, 7.3$ Hz, 1H)         | 25.6                                      | 2.72 (dq, $J = 17.4, 7.3$ Hz, 1H)       | 25.6                         |
|                            | 2.41 (dq, $J = 17.1, 7.3$ Hz, 1H)         |                                           | 2.40 (dq, $J = 17.4, 7.3$ Hz, 1H)       |                              |
| 20                         |                                           | 184.2                                     |                                         | 184.3                        |
| <i>N</i> <sub>a</sub> -OMe | 3.95 (s, 3H)                              | 63.3                                      | 3.95 (s, 3H)                            | 63.3                         |

## Gelsedine (2)

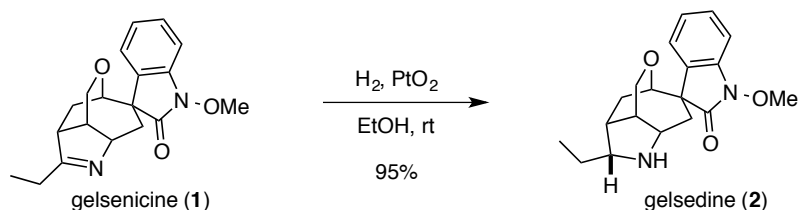

A 10-mL, glass test tube with ground joint equipped with a three way cock and a magnetic stir bar was charged with gelsenicine (**1**) (4.5 mg, 0.014 mmol) and platinum oxide (3.2 mg, 0.014 mmol) in EtOH (300  $\mu$ L). The suspension was stirred under H<sub>2</sub> atmosphere (balloon, 1 atm) at room temperature. After 7 h, the resulting solution was filtered through Celite and washed with EtOAc (5 mL), concentrated *in vacuo* to afford the crude product. The residue was purified with preparative thin layer chromatography (CHCl<sub>3</sub>/CH<sub>3</sub>OH = 3/1) to afford gelsedine (**2**) (4.3 mg, 0.013 mmol, 95%) as a white film. [TH03068]

R<sub>f</sub> = 0.08 (CHCl<sub>3</sub>/CH<sub>3</sub>OH = 9/1, UV, Ce-PMA);

[ $\alpha$ ]<sub>D</sub><sup>23</sup> -124 (*c* = 0.29, CHCl<sub>3</sub>);

IR (film, cm<sup>-1</sup>) 3308, 2925, 1706, 1617, 1464, 1436, 1323, 1220, 1042;

<sup>1</sup>H NMR (CDCl<sub>3</sub>, 400 MHz)  $\delta$  7.40 (d, *J* = 7.4 Hz, 1H), 7.29 (dd, *J* = 7.7, 7.7 Hz, 1H), 7.12 (dd, *J* = 7.7, 7.4 Hz, 1H), 6.95 (d, *J* = 7.7 Hz, 1H), 4.33 (dd, *J* = 11.0, 4.1 Hz, 1H), 4.25 (d, *J* = 11.0 Hz, 1H), 4.00 (s, 3H), 3.73 (m, 1H), 3.50 (d, *J* = 6.9 Hz, 1H), 2.99 (m, 1H), 2.49 (m, 1H), 2.20 (m, 1H), 2.17 (m, 1H), 2.13 (dd, *J* = 16.0, 3.7 Hz, 1H), 2.02 (dd, *J* = 16.0, 2.8 Hz, 1H), 1.92 (ddd, *J* = 16.0, 11.4, 6.9 Hz, 1H), 1.83 (m, 1H), 1.75 (m, 1H), 1.01 (t, *J* = 7.4 Hz, 3H);

<sup>13</sup>C NMR (CDCl<sub>3</sub>, 100 MHz)  $\delta$  174.5, 137.9, 131.6, 128.2, 125.3, 123.7, 107.1, 74.5, 65.4, 63.8, 63.4, 59.6, 57.3, 41.6, 34.5, 33.7, 21.4, 21.2, 12.0;

HRMS (ESI) calcd for C<sub>19</sub>H<sub>22</sub>N<sub>2</sub>NaO<sub>3</sub> ([M+Na]<sup>+</sup>) 329.1865, found 329.1871.

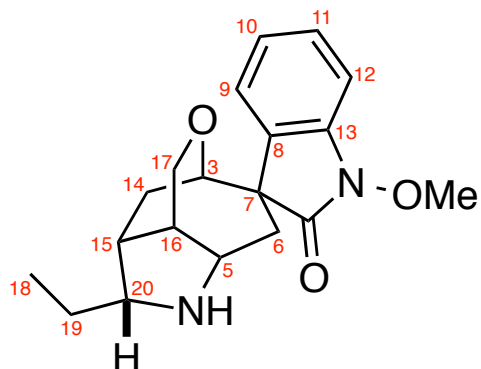

<sup>1</sup>H and <sup>13</sup>C NMR Data for Gelsedine (**2**)

|                            | Reference (Semisynthesis)                 |                                           | This Synthesis                           |                              |
|----------------------------|-------------------------------------------|-------------------------------------------|------------------------------------------|------------------------------|
|                            | $\delta_{\text{H}}$ (500 Hz) <sup>3</sup> | $\delta_{\text{C}}$ (125 Hz) <sup>3</sup> | $\delta_{\text{H}}$ (400 Hz)             | $\delta_{\text{C}}$ (100 Hz) |
| 2                          |                                           | 174.4                                     |                                          | 174.5                        |
| 3                          | 3.68 (d, $J = 7.1$ Hz, 1H)                | 74.5                                      | 3.50 (d, $J = 6.9$ Hz, 1H)               | 74.5                         |
| 5                          | 3.68 (m, 1H)                              | 59.7                                      | 3.73 (m, 1H)                             | 59.6                         |
| 6                          | 2.12 (dd, $J = 15.8, 3.6$ Hz, 1H)         | 33.8                                      | 2.13 (dd, $J = 16.0, 3.7$ Hz, 1H)        | 33.7                         |
|                            | 2.02 (dd, $J = 15.8, 3.0$ Hz, 1H)         |                                           | 2.02 (dd, $J = 16.0, 2.8$ Hz, 1H)        |                              |
| 7                          |                                           | 57.3                                      |                                          | 57.3                         |
| 8                          |                                           | 131.7                                     |                                          | 131.6                        |
| 9                          | 7.40 (dd, $J = 7.7, 0.7$ Hz, 1H)          | 125.3                                     | 7.40 (d, $J = 7.4$ Hz, 1H)               | 125.3                        |
| 10                         | 7.13 (td, $J = 7.6, 1.0$ Hz, 1H)          | 123.6                                     | 7.12 (dd, $J = 7.7, 7.4$ Hz, 1H)         | 123.7                        |
| 11                         | 7.29 (td, $J = 7.7, 1.2$ Hz, 1H)          | 128.1                                     | 7.29 (dd, $J = 7.7, 7.7$ Hz, 1H)         | 128.2                        |
| 12                         | 6.95 (brd, $J = 7.7$ Hz, 1H)              | 107.1                                     | 6.95 (d, $J = 7.7$ Hz, 1H)               | 107.1                        |
| 13                         |                                           | 137.9                                     |                                          | 137.9                        |
| 14                         | 2.19 (dd, $J = 15.4, 4.1$ Hz, 1H)         | 21.2 <sup>†</sup>                         | 2.20 (m, 1H)                             | 21.2                         |
|                            | 1.91 (ddd, $J = 15.1, 10.3, 7.1$ Hz, 1H)  |                                           | 1.92 (ddd, $J = 16.0, 11.4, 6.9$ Hz, 1H) |                              |
| 15                         | 2.16 (m, 1H)                              | 34.6                                      | 2.17 (m, 1H)                             | 23.5                         |
| 16                         | 2.48 (m, 1H)                              | 41.7                                      | 2.49 (m, 1H)                             | 41.6                         |
| 17                         | 4.34 (dd, $J = 10.7, 4.1$ Hz, 1H)         | 63.8                                      | 4.33 (dd, $J = 11.0, 4.1$ Hz, 1H)        | 63.8                         |
|                            | 4.26 (d, $J = 10.8$ Hz, 1H)               |                                           | 4.25 (d, $J = 11.0$ Hz, 1H)              |                              |
| 18                         | 1.01 (t, $J = 7.5$ Hz, 3H)                | 12.0                                      | 1.01 (t, $J = 7.4$ Hz, 3H)               | 12.0                         |
| 19                         | 1.83 (m, 1H)                              | 21.4 <sup>†</sup>                         | 1.83 (m, 1H)                             | 21.4                         |
|                            | 1.71 (m, 1H)                              |                                           | 1.75 (m, 1H)                             |                              |
| 20                         | 2.96 (m, 1H)                              | 65.5                                      | 2.99 (m, 1H)                             | 65.4                         |
| <i>N</i> <sub>a</sub> -OMe | 4.00 (s, 3H)                              | 63.3                                      | 4.00 (s, 3H)                             | 63.4                         |

<sup>†</sup>Assignments may be interchanged.



## 14,15-Dihydroxygelsenicine (5)

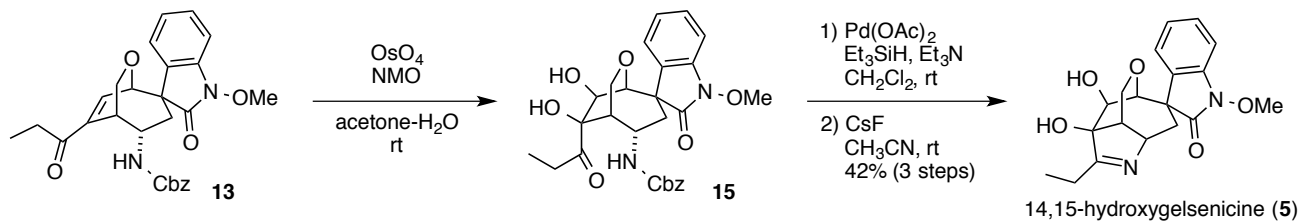

A 10-mL, screw cap glass test tube equipped with a magnetic stir bar was charged with **13** (10.7 mg, 0.0225 mmol), acetone (250  $\mu\text{L}$ ), and water (150  $\mu\text{L}$ ). The clear solution was stirred at room temperature, then  $\text{OsO}_4$  (0.04 M solution in *t*-BuOH, 56.1  $\mu\text{L}$ , 2.25  $\mu\text{mol}$ ) and *N*-methylmorpholine *N*-oxide (13.2 mg, 0.113 mmol) was sequentially added. After stirring for 30 min at the same temperature, the reaction mixture was added sat.  $\text{Na}_2\text{S}_2\text{O}_3$  aq (1 mL), sat.  $\text{NaHCO}_3$  aq (1 mL), and EtOAc (1 mL). After phases were partitioned, organic phase was collected and the aqueous phase was extracted with  $\text{CHCl}_3/\text{CH}_3\text{OH} = 9/1$  (1 mL) three times. The combined organic phase was dried over  $\text{MgSO}_4$  (ca. 1 g), filtered and concentrated *in vacuo* to give the crude **15**. A 10-mL, screw cap glass test tube equipped with a magnetic stir bar was charged with the residue,  $\text{Pd}(\text{OAc})_2$  (5.0 mg, 0.022 mmol),  $\text{Et}_3\text{N}$  (9.4  $\mu\text{L}$ , 0.067 mmol), and  $\text{CH}_2\text{Cl}_2$  (300  $\mu\text{L}$ ). The clear solution was stirred at room temperature and  $\text{Et}_3\text{SiH}$  (35.9  $\mu\text{L}$ , 0.225 mmol) was added. After stirring for 10 min at the same temperature, the reaction was quenched with sat.  $\text{NaHCO}_3$  aq (1 mL) and extracted with EtOAc (1 mL). The organic phase was collected and the aqueous phase was extracted with  $\text{CHCl}_3/\text{CH}_3\text{OH} = 9/1$  (1 mL) five times. The combined organic phase was dried over  $\text{MgSO}_4$  (ca. 1 g), filtered and concentrated *in vacuo*. A 10-mL, screw cap glass test tube equipped with a magnetic stir bar was charged with the residue and  $\text{CH}_3\text{CN}$  (300  $\mu\text{L}$ ). The solution was stirred at room temperature for 5 min, and cesium fluoride (6.8 mg, 0.045 mmol) was added. After stirring for 10 min at the same temperature, the reaction was quenched with sat.  $\text{NH}_4\text{Cl}$  aq (1 mL) and extracted with  $\text{CHCl}_3/\text{CH}_3\text{OH} = 9/1$  (1 mL). The organic phase was collected and the aqueous phase was extracted with  $\text{CHCl}_3/\text{MeOH} = 9/1$  (500  $\mu\text{L}$ ) ten times. The combined organic phase was dried over  $\text{MgSO}_4$  (ca. 1 g), filtered and concentrated *in vacuo*. The residue was purified by preparative thin layer chromatography ( $\text{CHCl}_3/\text{CH}_3\text{OH} = 3/1$ ) to afford 14,15-dihydroxygelsenicine (**5**) (3.4 mg, 9.5  $\mu\text{mol}$ , 42% for 3 steps) as pale yellow foam. [TH05236, TH05238, TH05239]

$R_f = 0.36$  ( $\text{CHCl}_3/\text{CH}_3\text{OH} = 9/1$ , UV, Ce-PMA);

$[\alpha]_D^{23} -99.4$  ( $c = 0.17$ ,  $\text{CHCl}_3$ );

IR (film,  $\text{cm}^{-1}$ ); 2920, 2360, 2340, 1718, 1651, 1617, 1466, 1321;

$^1\text{H}$  NMR ( $\text{CDCl}_3$ , 400 MHz)  $\delta$  7.50 (d,  $J = 7.8$  Hz, 1H), 7.30 (ddd,  $J = 7.8, 7.8, 0.9$  Hz, 1H), 7.11 (ddd,  $J = 7.8, 7.8, 0.9$  Hz, 1H), 6.91 (d,  $J = 7.8$  Hz, 1H), 4.47 (m, 1H), 4.33 (m, 1H), 4.32 (dd,  $J = 11.0, 3.7$  Hz, 1H), 4.26 (d,  $J = 11.0$  Hz, 1H), 3.94 (s, 3H), 3.85 (d,  $J = 2.3$  Hz, 1H), 2.58 (m, 2H), 2.40 (dd,  $J = 15.6, 4.1$  Hz, 1H), 2.40 (m, 1H), 2.34 (dd,  $J = 15.6, 2.3$  Hz, 1H), 1.32 (t,  $J = 7.3$  Hz,

3H);

$^{13}\text{C}$  NMR ( $\text{CDCl}_3$ , 100 MHz)  $\delta$  183.7, 170.6, 138.1, 131.3, 128.6, 124.6, 123.7, 107.0, 78.9, 77.2, 69.4, 66.4, 63.5, 60.6, 53.5, 46.3, 36.1, 21.9, 9.6;

HRMS (ESI) calcd for  $\text{C}_{19}\text{H}_{22}\text{N}_2\text{NaO}_5$  ( $[\text{M}+\text{Na}]^+$ ) 381.1426, found 381.1426.

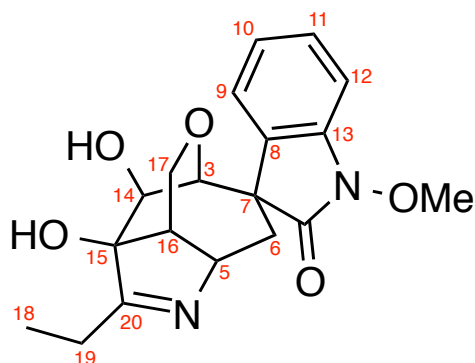

$^1\text{H}$  and  $^{13}\text{C}$  NMR Data for 14,15-Dihydroxygelsenicine (**5**)

|                     | Reference (Natural)                                                    |                                           | This Synthesis                                                         |                              |
|---------------------|------------------------------------------------------------------------|-------------------------------------------|------------------------------------------------------------------------|------------------------------|
|                     | $\delta_{\text{H}}$ (500 Hz) <sup>5</sup>                              | $\delta_{\text{C}}$ (125 Hz) <sup>5</sup> | $\delta_{\text{H}}$ (400 Hz)                                           | $\delta_{\text{C}}$ (100 Hz) |
| 2                   |                                                                        | 170.6                                     |                                                                        | 170.6                        |
| 3                   | 3.82 (d, $J = 2.1$ Hz, 1H)                                             | 77.2                                      | 3.85 (d, $J = 2.3$ Hz, 1H)                                             | 77.2                         |
| 5                   | 4.44 (m, 1H)                                                           | 69.2                                      | 4.47 (m, 1H)                                                           | 69.4                         |
| 6                   | 2.38 (dd, $J = 15.6, 4.6$ Hz, 1H)<br>2.28 (dd, $J = 15.6, 2.4$ Hz, 1H) | 36.1                                      | 2.40 (dd, $J = 15.6, 4.1$ Hz, 1H)<br>2.34 (dd, $J = 15.6, 2.3$ Hz, 1H) | 36.1                         |
| 7                   |                                                                        | 53.6                                      |                                                                        | 53.5                         |
| 8                   |                                                                        | 131.3                                     |                                                                        | 131.3                        |
| 9                   | 7.49 (d, $J = 7.6$ Hz, 1H)                                             | 124.6                                     | 7.50 (d, $J = 7.8$ Hz, 1H)                                             | 124.6                        |
| 10                  | 7.08 (td, $J = 7.6, 0.9$ Hz, 1H)                                       | 123.6                                     | 7.11 (ddd, $J = 7.8, 7.8, 0.9$ Hz, 1H)                                 | 123.7                        |
| 11                  | 7.28 (td, $J = 7.6, 0.9$ Hz, 1H)                                       | 128.5                                     | 7.30 (ddd, $J = 7.8, 7.8, 0.9$ Hz, 1H)                                 | 128.6                        |
| 12                  | 6.88 (d, $J = 7.6$ Hz, 1H)                                             | 106.9                                     | 6.91 (d, $J = 7.8$ Hz, 1H)                                             | 107.0                        |
| 13                  |                                                                        | 138.0                                     |                                                                        | 138.1                        |
| 14                  | 4.31 (d, $J = 2.1$ Hz, 1H)                                             | 66.0                                      | 4.33 (m, 1H)                                                           | 66.4                         |
| 15                  |                                                                        | 78.8                                      |                                                                        | 78.9                         |
| 16                  | 2.38 (overlapped)                                                      | 46.3                                      | 2.40 (m, 1H)                                                           | 46.3                         |
| 17                  | 4.31 (dd, $J = 11.0, 3.5$ Hz, 1H)<br>4.22 (brd, $J = 11.0$ Hz, 1H)     | 60.5                                      | 4.32 (dd, $J = 11.0, 3.7$ Hz, 1H)<br>4.26 (d, $J = 11.0$ Hz, 1H)       | 60.6                         |
| 18                  | 1.28 (t, $J = 7.3$ Hz, 3H)                                             | 9.6                                       | 1.32 (t, $J = 7.3$ Hz, 3H)                                             | 9.6                          |
| 19                  | 2.54 (m, 2H)                                                           | 22.0                                      | 2.58 (m, 2H)                                                           | 21.9                         |
| 20                  |                                                                        | 184.0                                     |                                                                        | 183.7                        |
| $N_{\text{a}}$ -OMe | 3.91 (s, 3H)                                                           | 63.4                                      | 3.94 (s, 3H)                                                           | 63.5                         |

## 14-Hydroxygelsenicine (4)

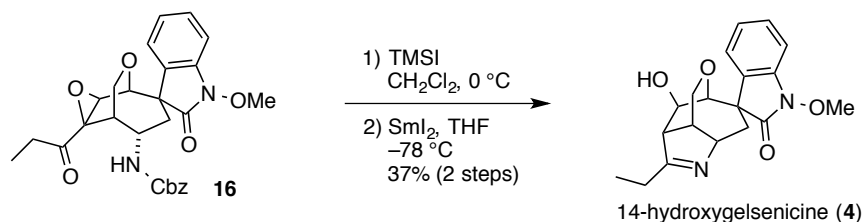

A 10-mL, screw cap glass test tube equipped with a magnetic stir bar was charged with **16** (10.2 mg, 0.0213 mmol) and  $\text{CH}_2\text{Cl}_2$  (250  $\mu\text{L}$ ). The clear solution was stirred at 0  $^\circ\text{C}$  for 5 min and freshly prepared trimethylsilyl iodide<sup>1</sup> (1 M solution in  $\text{CH}_2\text{Cl}_2$ , 85  $\mu\text{L}$ , 0.085 mmol) was added. After stirring for 1.5 h at 0  $^\circ\text{C}$ , the reaction mixture was quenched with sat.  $\text{NaHCO}_3$  aq (15  $\mu\text{L}$ ) and sat.  $\text{NaHSO}_3$  aq (15  $\mu\text{L}$ ). The mixture was acidified with 3 N  $\text{HCl}$  aq (100  $\mu\text{L}$ ) to pH = 2. The mixture was extracted with *n*-hexane/ $\text{EtOAc}$  = 3/1 (2 mL) and the organic phase was discarded. The aqueous phase was then basified with 5 N  $\text{NaOH}$  aq (65  $\mu\text{L}$ ) to pH = 8, and extracted with  $\text{CH}_2\text{Cl}_2/\text{CH}_3\text{OH}$  = 5/1 (1 mL) seven times. The combined organic extract was dried over  $\text{MgSO}_4$  (ca. 1 g), filtered and concentrated *in vacuo* to give the crude amine. A 10-mL, glass test tube with ground joint equipped with a three way cock and a magnetic stir bar was charged with the residue and THF (500  $\mu\text{L}$ ). The clear solution was stirred at  $-78^\circ\text{C}$  for 10 min and samarium iodide (0.1 M solution in THF, 530  $\mu\text{L}$ , 0.0530 mmol) was added. After stirring for 10 min at  $-78^\circ\text{C}$ ,  $\text{CH}_3\text{OH}$  (100  $\mu\text{L}$ ) was added. Stirring was continued for additional 10 min, then the reaction was quenched with opening the flask and addition of brine (1 mL). The reaction mixture was extracted with  $\text{EtOAc}$  (1 mL). The organic phase was collected and the aqueous phase was extracted with  $\text{CHCl}_3/\text{CH}_3\text{OH}$  = 9/1 (1 mL) three times. The combined organic phase was dried over  $\text{MgSO}_4$  (ca. 1 g), filtered and concentrated *in vacuo*. The residue was purified by preparative thin layer chromatography ( $\text{EtOAc}/\text{CH}_3\text{OH}$  = 9/1) to afford 14-hydroxygelsenicine (**4**) (2.7 mg, 7.9  $\mu\text{mol}$ , 37% for 2 steps) as a colorless oil. [TH03057, TH03060]

$R_f$  = 0.43 ( $\text{CHCl}_3/\text{CH}_3\text{OH}$  = 9/1, UV, Ce-PMA);

$[\alpha]_D^{23}$   $-143$  ( $c$  = 0.21,  $\text{CHCl}_3$ );

IR (neat,  $\text{cm}^{-1}$ ) 3273, 2935, 2916, 1718, 1646, 1616, 1465, 1040;

$^1\text{H}$  NMR ( $\text{CDCl}_3$ , 400 MHz)  $\delta$  7.52 (d,  $J$  = 7.6 Hz, 1H), 7.28 (dd,  $J$  = 7.6, 7.6 Hz, 1H), 7.09 (dd,  $J$  = 7.6, 7.6 Hz, 1H), 6.89 (d,  $J$  = 7.6 Hz, 1H), 4.46 (m, 1H), 4.45 (dd,  $J$  = 11.0, 3.2 Hz, 1H), 4.42 (m, 1H), 4.34 (d,  $J$  = 11.0 Hz, 1H), 3.95 (s, 3H), 3.69 (s, 1H), 2.90 (d,  $J$  = 8.2 Hz, 1H), 2.78 (dq,  $J$  = 17.0, 7.3 Hz, 1H), 2.61 (ddd,  $J$  = 8.2, 8.2, 3.2 Hz, 1H), 2.50 (dq,  $J$  = 17.0, 7.3 Hz, 1H), 2.43 (dd,  $J$  = 15.6, 4.6 Hz, 1H), 2.32 (dd,  $J$  = 15.6, 2.3 Hz, 1H), 1.31 (t,  $J$  = 7.3 Hz, 3H);

$^{13}\text{C}$  NMR ( $\text{CDCl}_3$ , 100 MHz)  $\delta$  181.1, 170.9, 138.0, 131.6, 128.3, 124.6, 123.6, 106.8, 79.2, 71.9, 66.5, 63.4, 61.8, 53.7, 52.2, 38.3, 37.5, 26.0, 10.0;

HRMS (ESI) calcd for  $\text{C}_{19}\text{H}_{22}\text{N}_2\text{NaO}_4$  ( $[\text{M}+\text{Na}]^+$ ) 365.1477, found 365.1472.

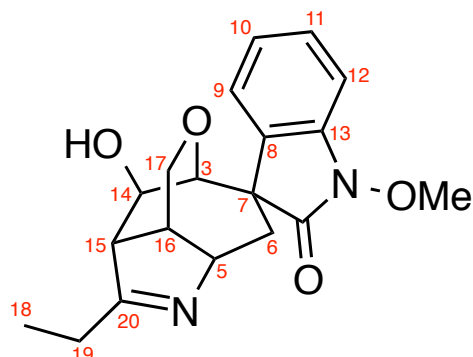

<sup>1</sup>H and <sup>13</sup>C NMR Data for 14-Hydroxygelsenicine (4)

|                            | Reference (Natural)                       |                                           | This Synthesis                         |                              |
|----------------------------|-------------------------------------------|-------------------------------------------|----------------------------------------|------------------------------|
|                            | $\delta_{\text{H}}$ (500 Hz) <sup>6</sup> | $\delta_{\text{C}}$ (125 Hz) <sup>6</sup> | $\delta_{\text{H}}$ (400 Hz)           | $\delta_{\text{C}}$ (100 Hz) |
| 2                          |                                           | 170.9                                     |                                        | 170.9                        |
| 3                          | 3.68 (brs, 1H)                            | 79.2                                      | 3.69 (s, 1H)                           | 79.2                         |
| 5                          | 4.41 (m, 1H)                              | 71.9                                      | 4.42 (m, 1H)                           | 71.9                         |
| 6                          | 2.42 (dd, $J = 15.6, 4.6$ Hz, 1H)         | 37.5                                      | 2.43 (dd, $J = 15.6, 4.6$ Hz, 1H)      | 37.5                         |
|                            | 2.31 (dd, $J = 15.6, 2.1$ Hz, 1H)         |                                           | 2.32 (dd, $J = 15.6, 2.3$ Hz, 1H)      |                              |
| 7                          |                                           | 53.7                                      |                                        | 53.7                         |
| 8                          |                                           | 131.6                                     |                                        | 131.6                        |
| 9                          | 7.51 (d, $J = 7.6$ Hz, 1H)                | 124.6                                     | 7.52 (d, $J = 7.6$ Hz, 1H)             | 124.6                        |
| 10                         | 7.09 (brt, $J = 7.6$ Hz, 1H)              | 123.5                                     | 7.09 (dd, $J = 7.6, 7.6$ Hz, 1H)       | 123.6                        |
| 11                         | 7.27 (brt, $J = 7.6$ Hz, 1H)              | 128.3                                     | 7.28 (dd, $J = 7.6, 7.6$ Hz, 1H)       | 128.3                        |
| 12                         | 6.89 (d, $J = 7.6$ Hz, 1H)                | 106.8                                     | 6.89 (d, $J = 7.6$ Hz, 1H)             | 106.8                        |
| 13                         |                                           | 138.0                                     |                                        | 138.0                        |
| 14                         | 4.44 (overlapped)                         | 66.4                                      | 4.46 (m, 1H)                           | 66.5                         |
| 15                         | 2.89 (d, $J = 8.5$ Hz, 1H)                | 52.2                                      | 2.90 (d, $J = 8.2$ Hz, 1H)             | 52.2                         |
| 16                         | 2.59 (td, $J = 8.5, 3.3$ Hz, 1H)          | 38.3                                      | 2.61 (ddd, $J = 8.2, 8.2, 3.2$ Hz, 1H) | 38.3                         |
| 17                         | 4.44 (overlapped)                         | 61.8                                      | 4.45 (dd, $J = 11.0, 3.2$ Hz, 1H)      | 61.8                         |
|                            | 4.33 (d, $J = 11.0$ Hz, 1H)               |                                           | 4.34 (d, $J = 11.0$ Hz, 1H)            |                              |
| 18                         | 1.30 (t, $J = 7.3$ Hz, 3H)                | 10.0                                      | 1.31 (t, $J = 7.3$ Hz, 3H)             | 10.0                         |
| 19                         | 2.77 (dq, $J = 17.1, 7.3$ Hz, 1H)         | 26.0                                      | 2.78 (dq, $J = 17.0, 7.3$ Hz, 1H)      | 26.0                         |
|                            | 2.49 (dq, $J = 17.1, 7.3$ Hz, 1H)         |                                           | 2.50 (dq, $J = 17.0, 7.3$ Hz, 1H)      |                              |
| 20                         |                                           | 181.1                                     |                                        | 181.1                        |
| <i>N</i> <sub>a</sub> -OMe | 3.94 (s, 3H)                              | 63.4                                      | 3.95 (s, 3H)                           | 63.4                         |

## References

1. Sakurai, H.; Shirahata, A.; Sasaki, K.; Hosomi, A. *Synthesis* **1979**, 1979, 740.
2. Kogure, N.; Ishii, N.; Kitajima, M.; Wongseripipatana, S.; Takayama, H. *Org. Lett.* **2006**, 8, 3085.
3. Takayama, H.; Tominaga, Y.; Kitajima, M.; Aimi, N.; Sakai, S.-i. *J. Org. Chem.* **1994**, 59, 4381.
4. Takayama, H.; Sakai, S.-i. In *Studies in Natural Products Chemistry*; Atta-ur-Rahman, Ed.; Elsevier: 1995; Vol. 15, p 465.
5. Kitajima, M.; Kogure, N.; Yamaguchi, K.; Takayama, H.; Aimi, N. *Org. Lett.* **2003**, 5, 2075.
6. Kogure, N. Studies on Isolation, Synthesis and Biological Function of Anti-tumor Gelsemium Alkaloids. Ph.D. Dissertation, Chiba University, Chiba, Japan, 2008.

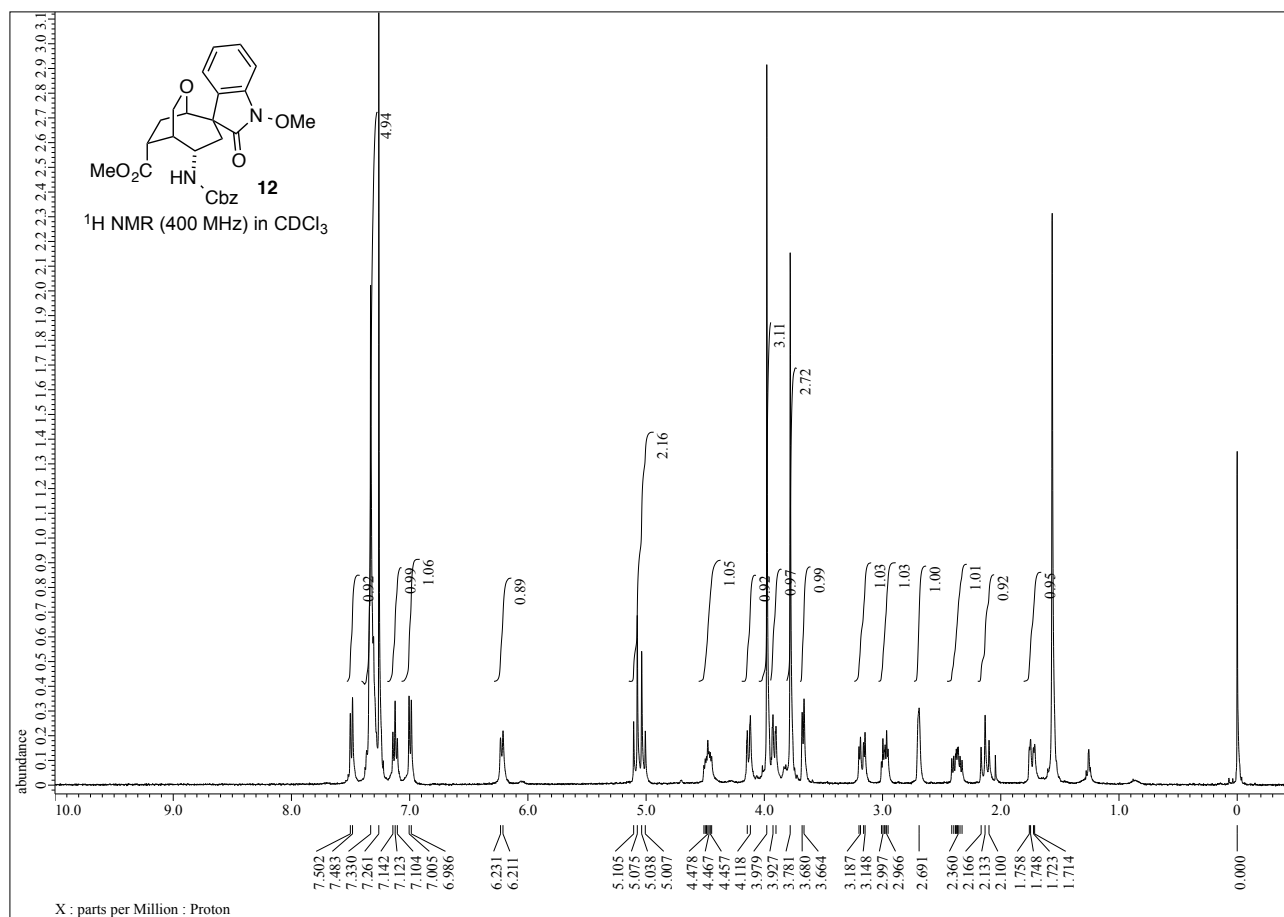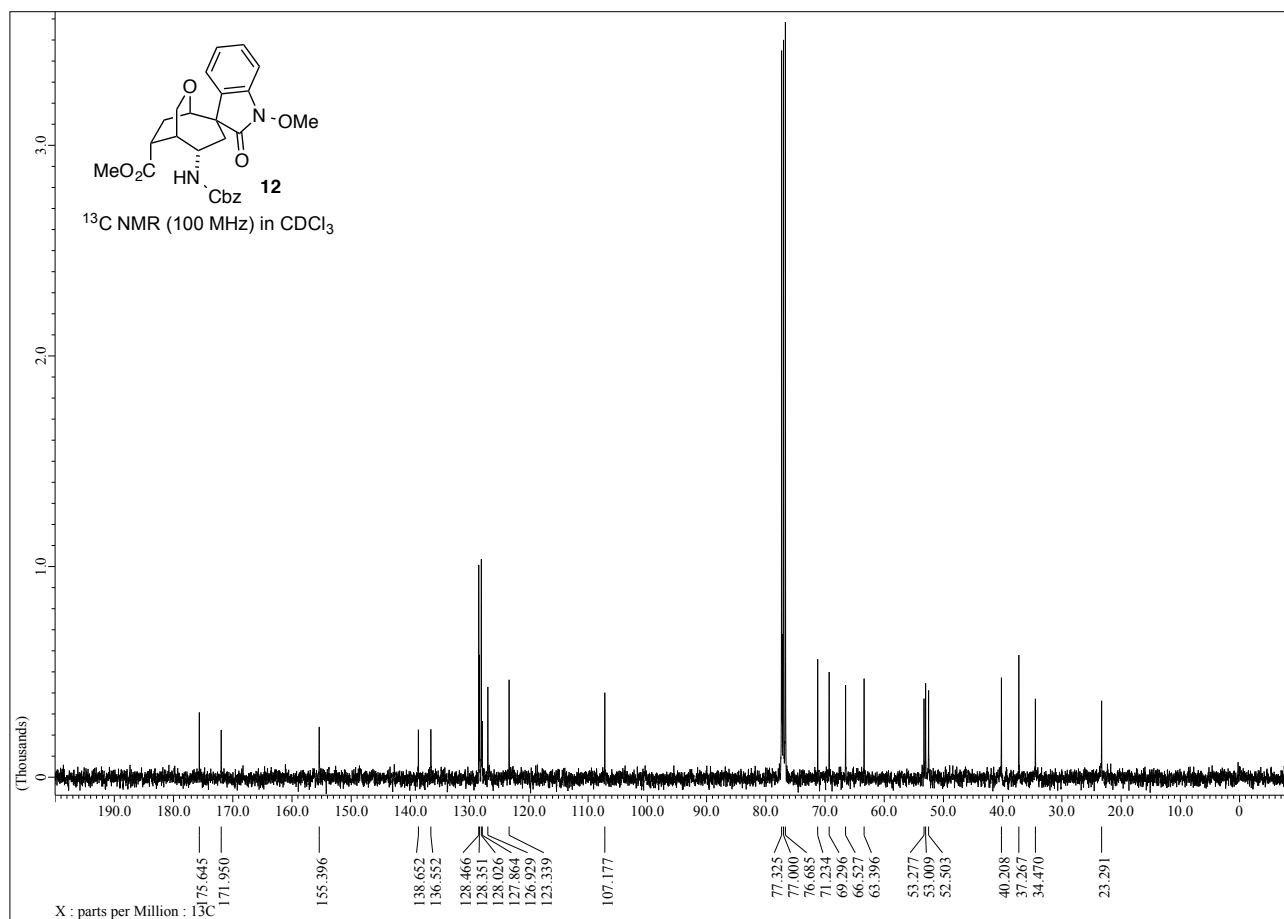

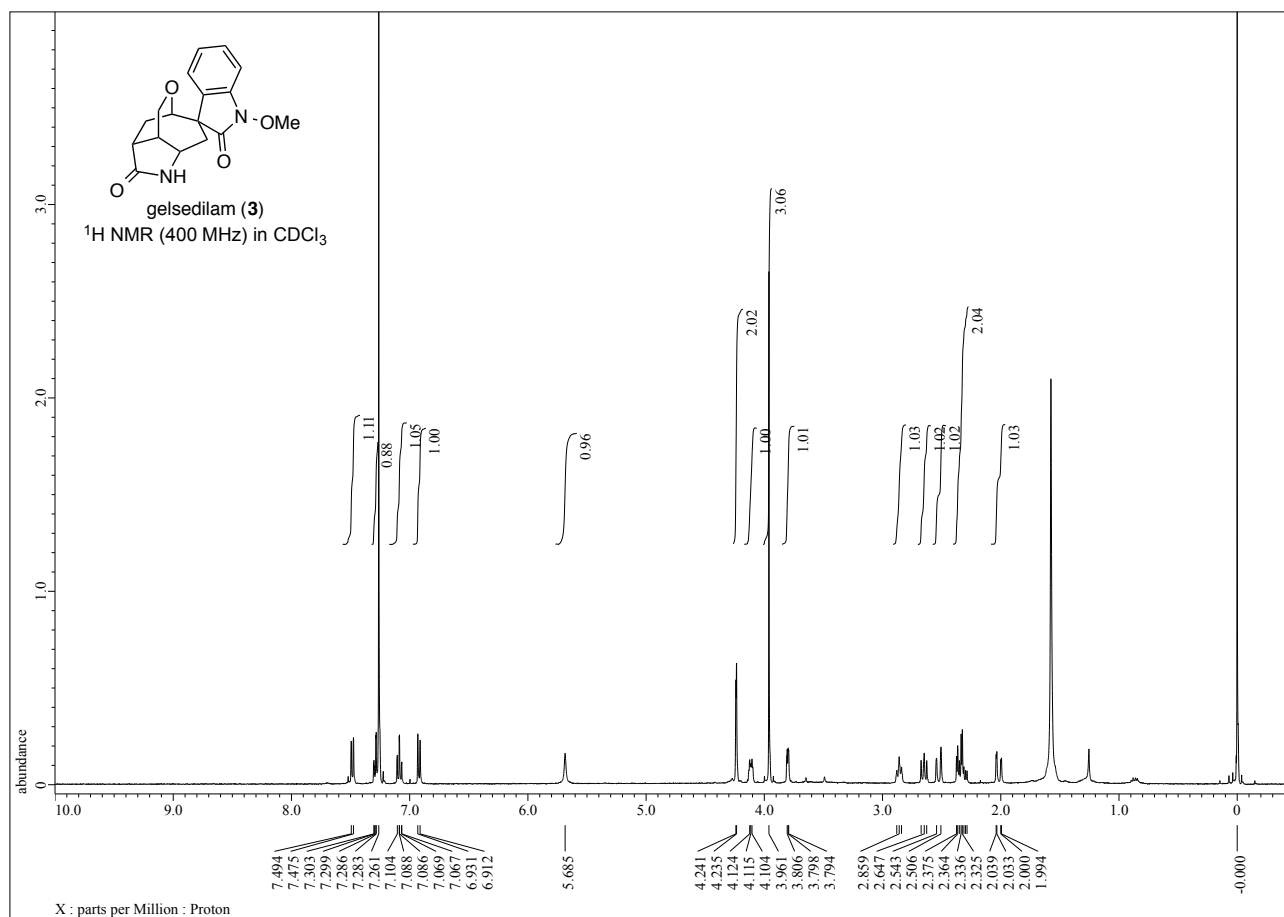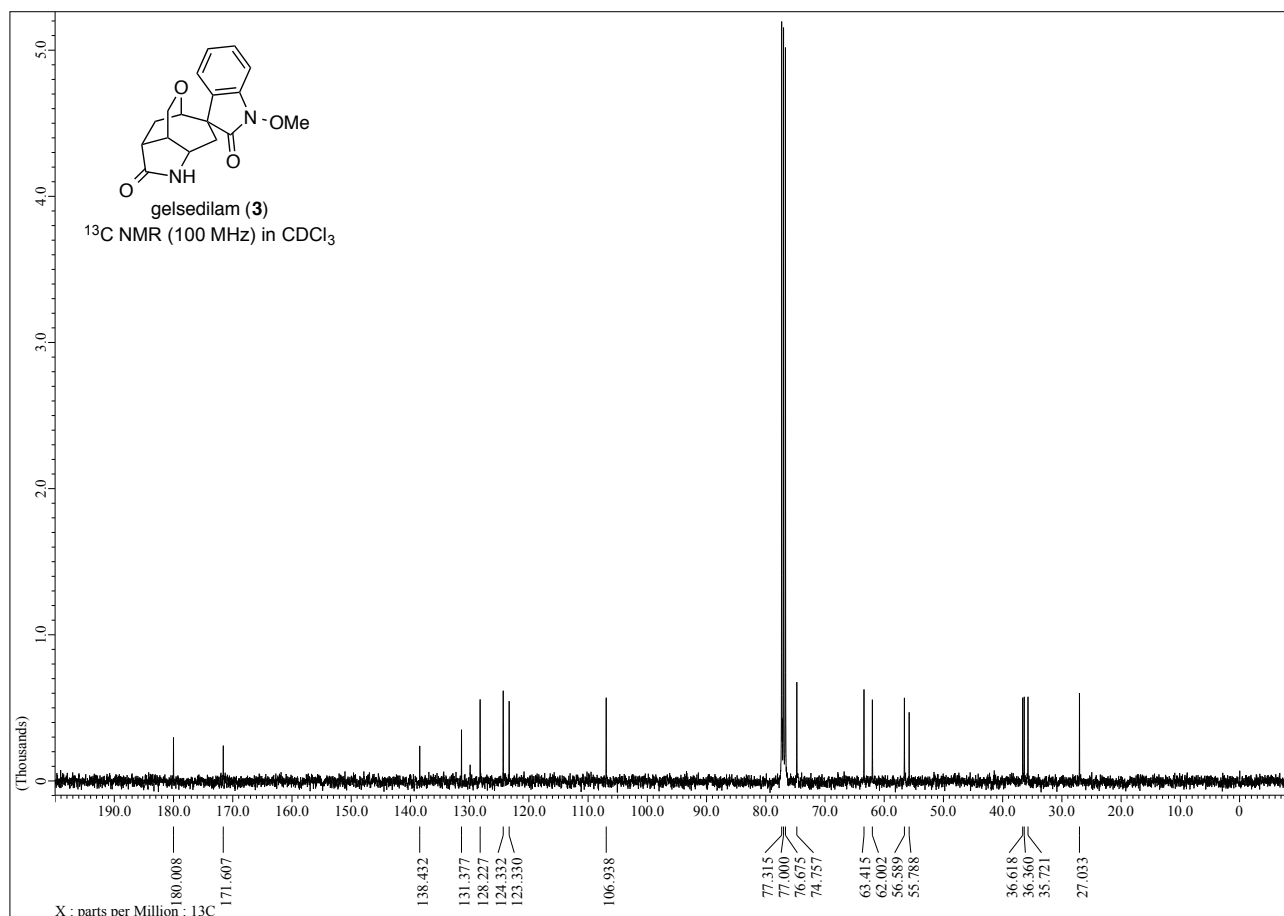

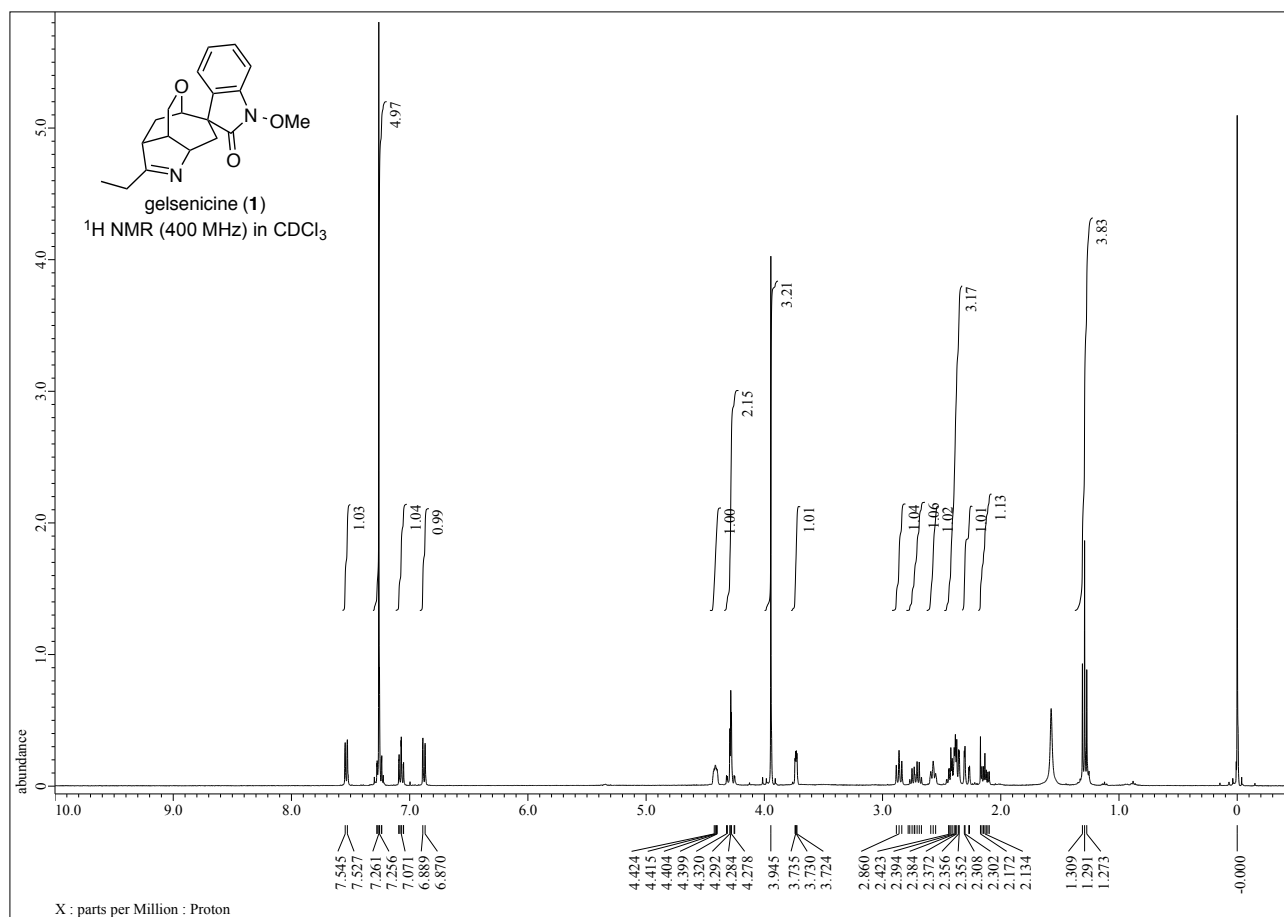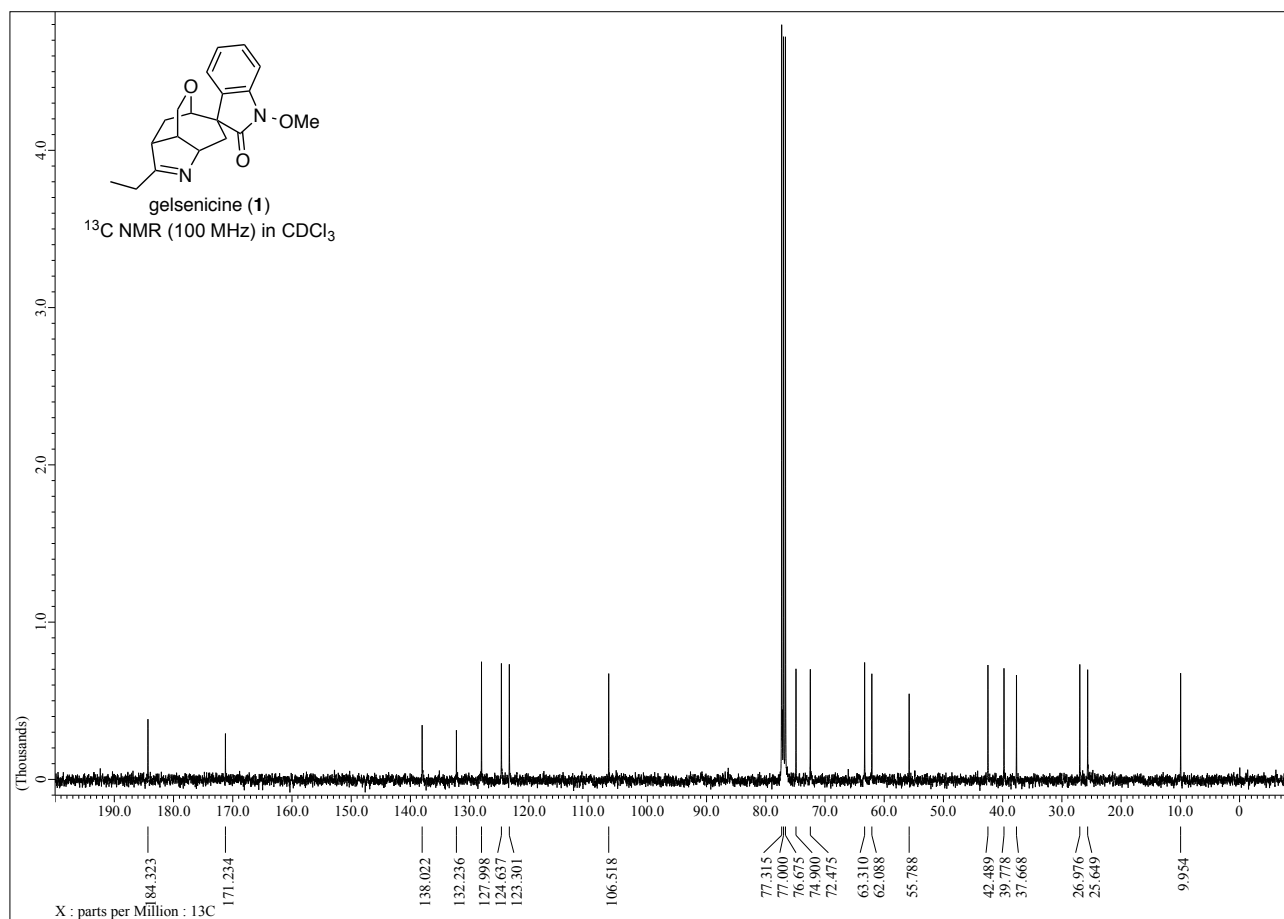



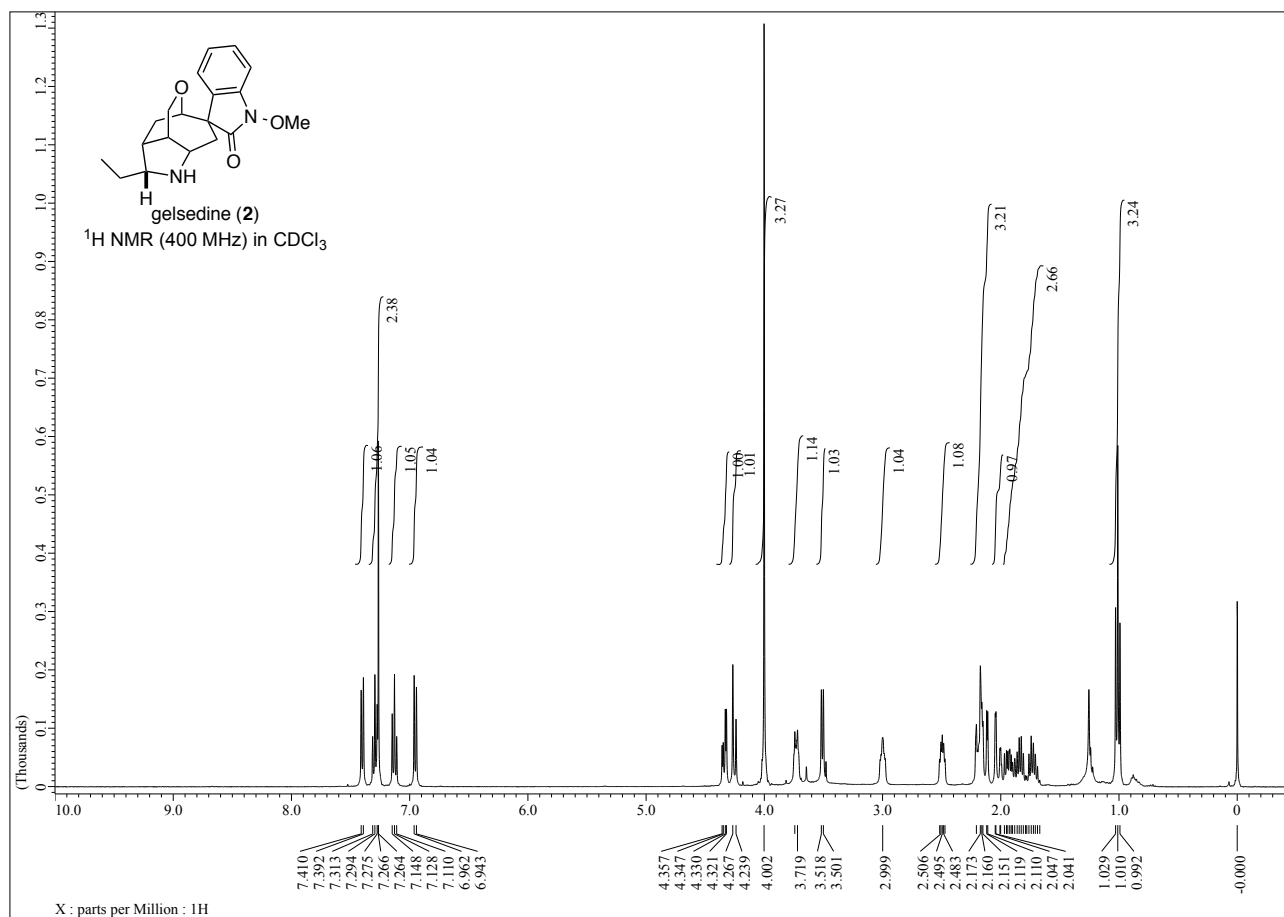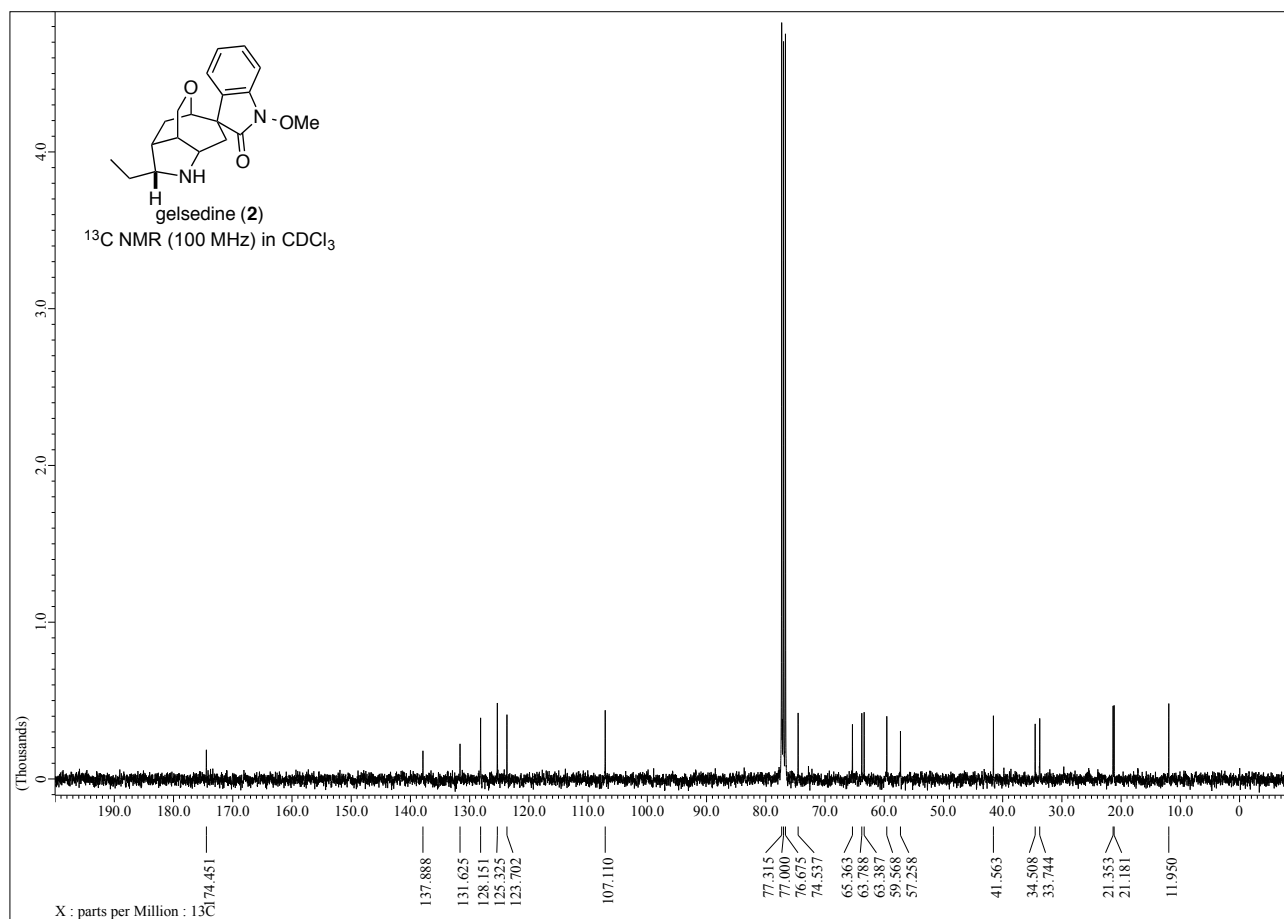

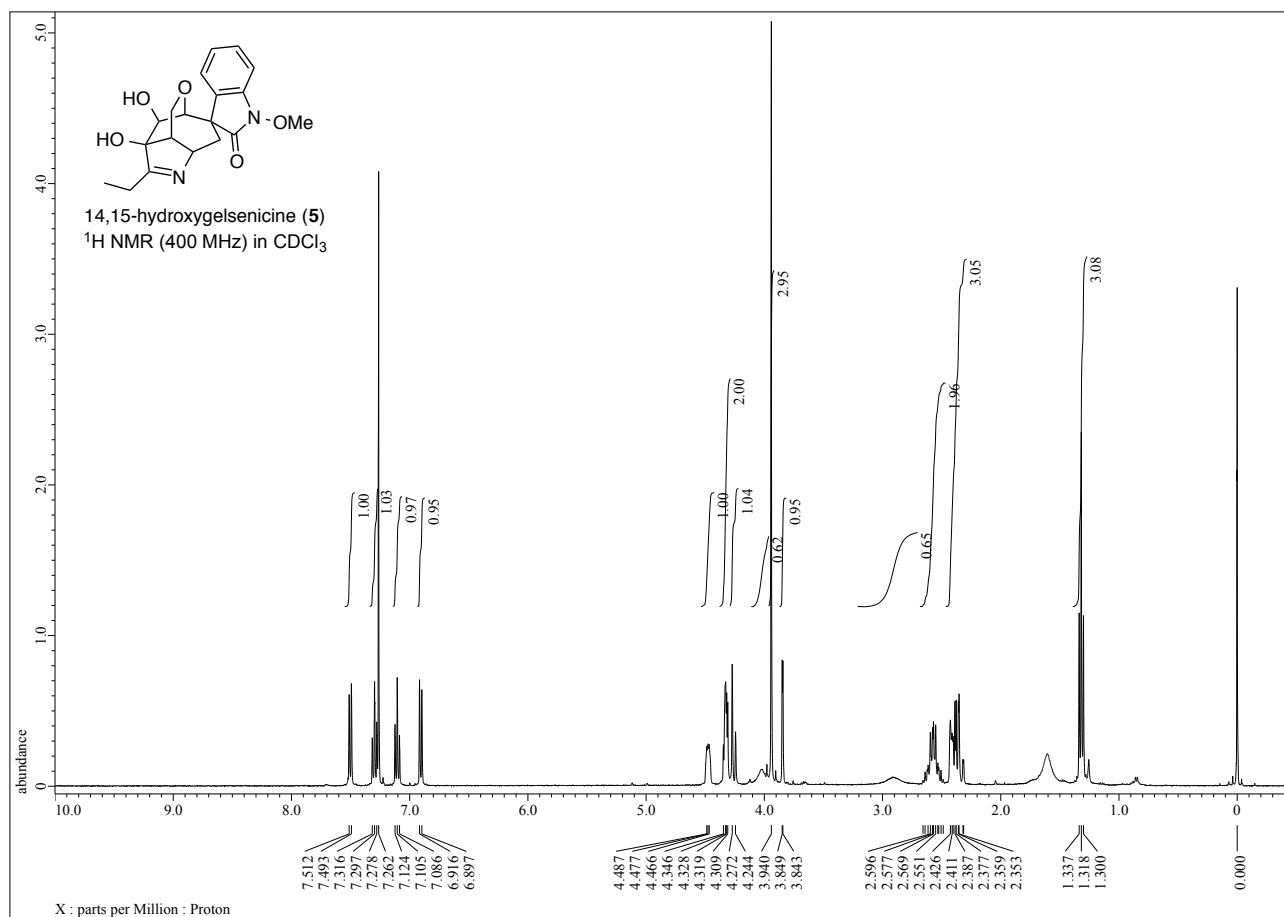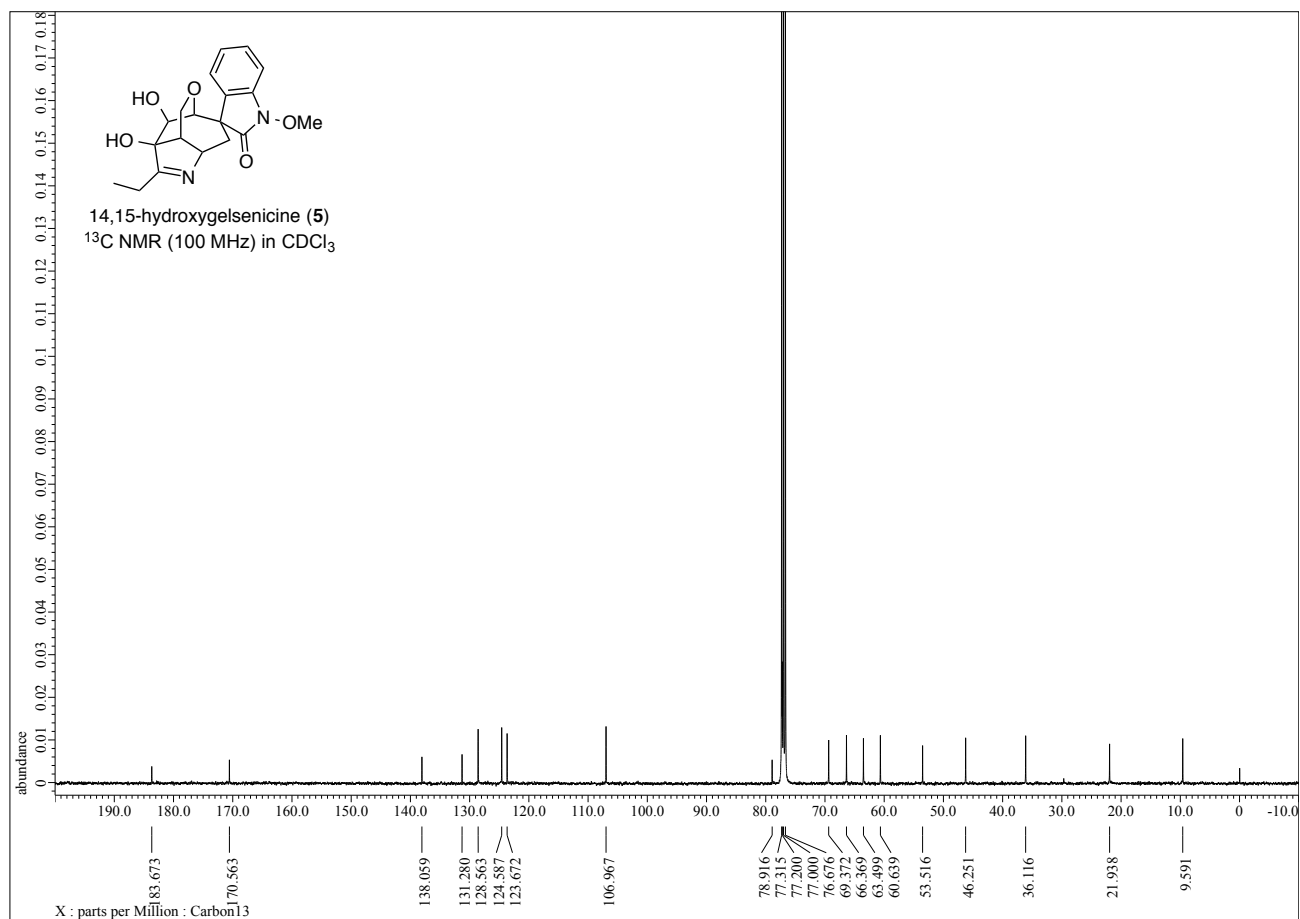

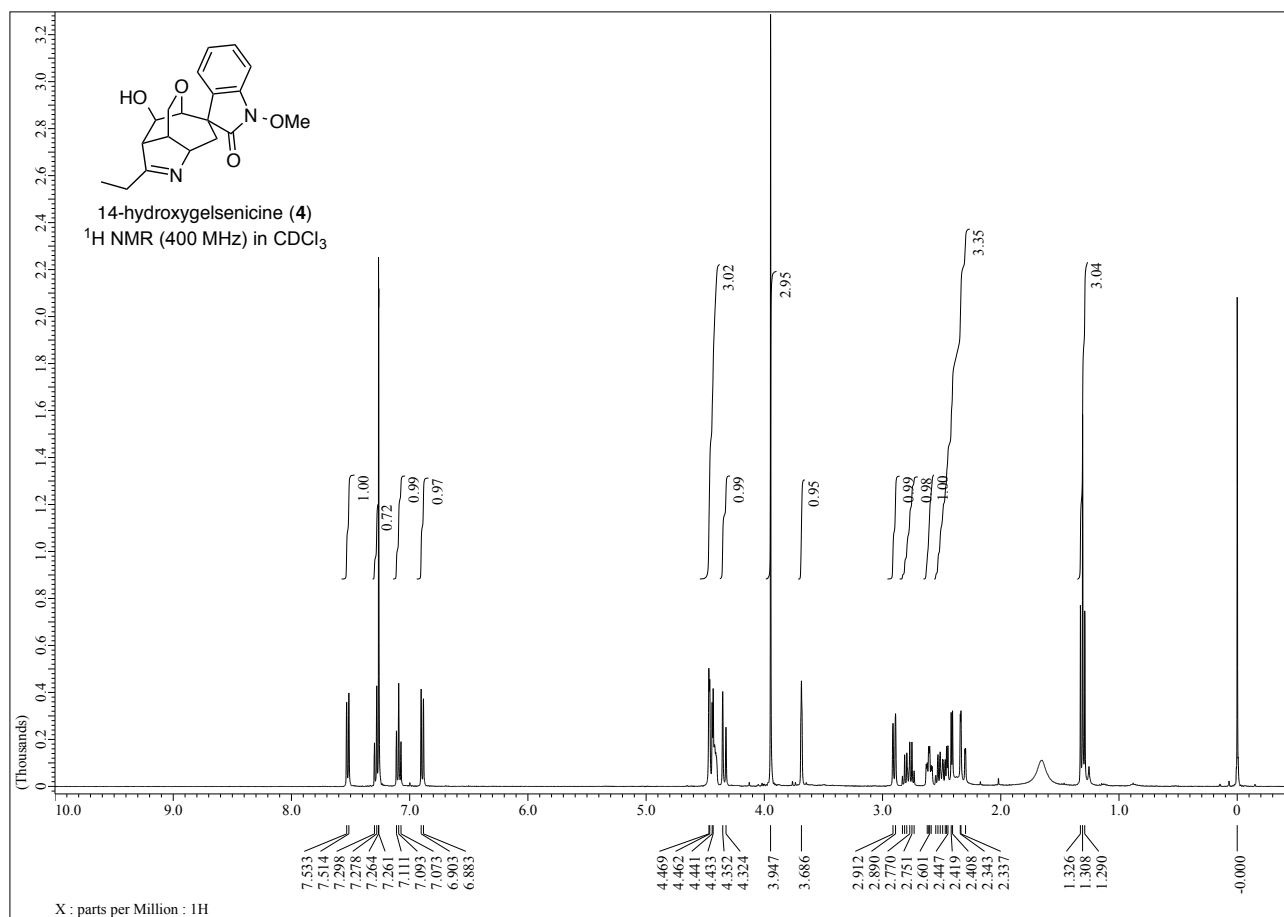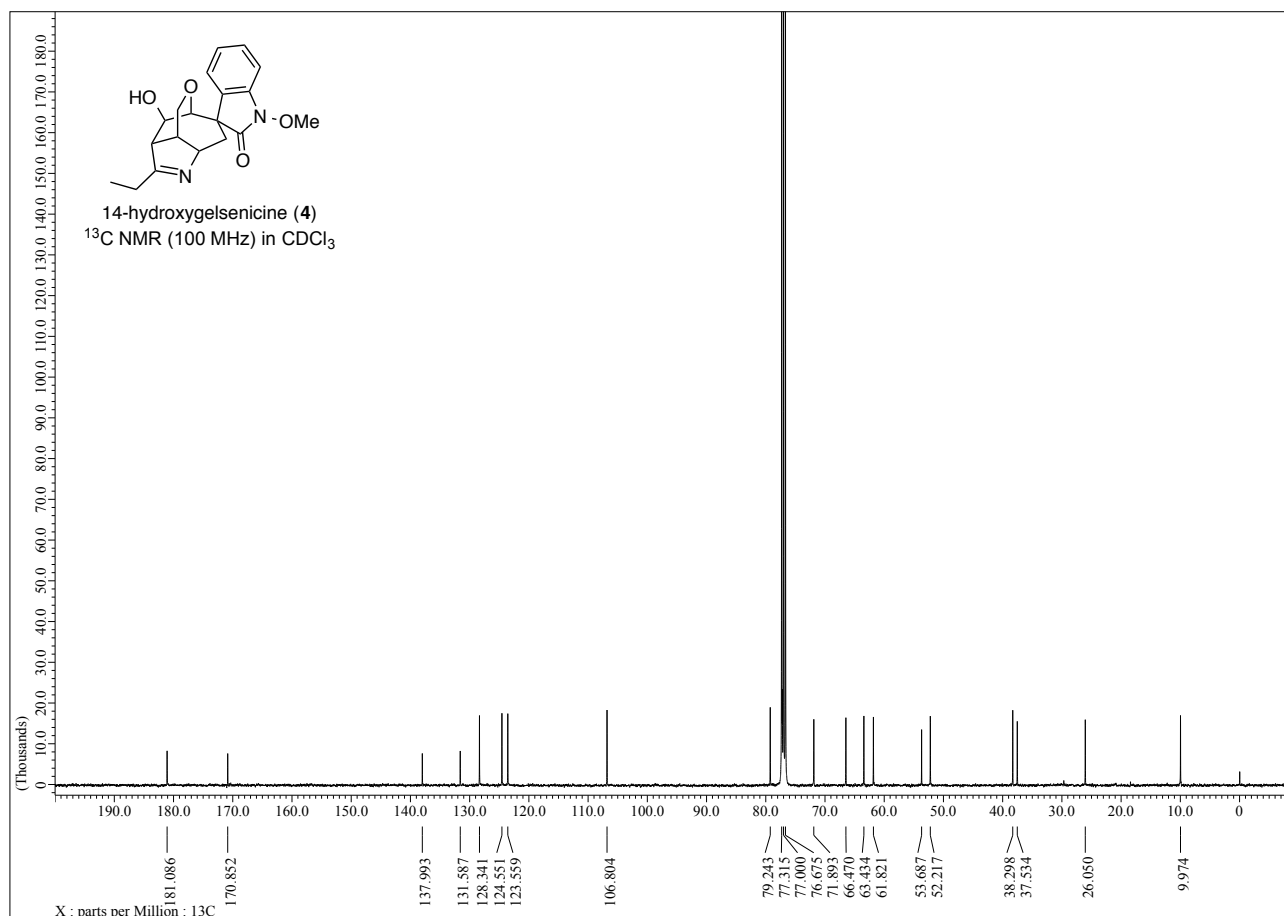

Supplement: Supplementary file 1 [file 5911230]
